# Supplementary material
Source: PubMed Central journal article supplement (PMC4947667)

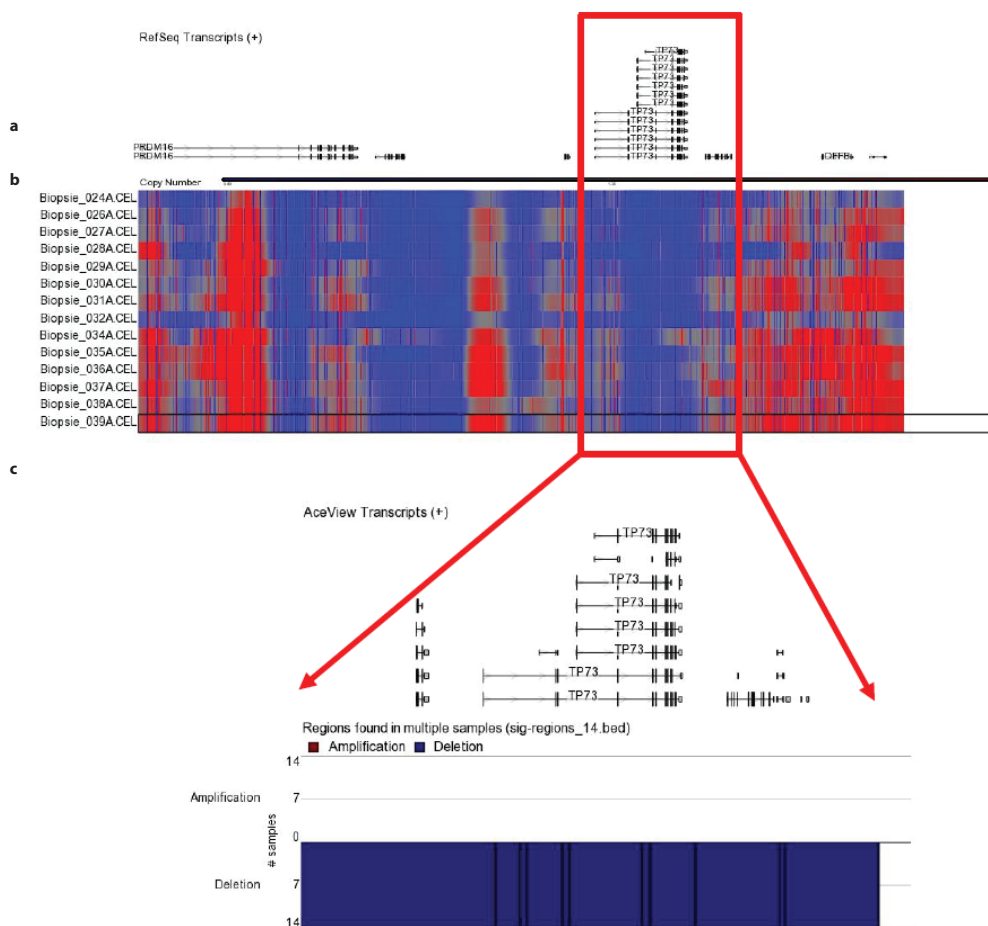

Supplement: cdd201618x2.pdf [file cdd201618x2.pdf]

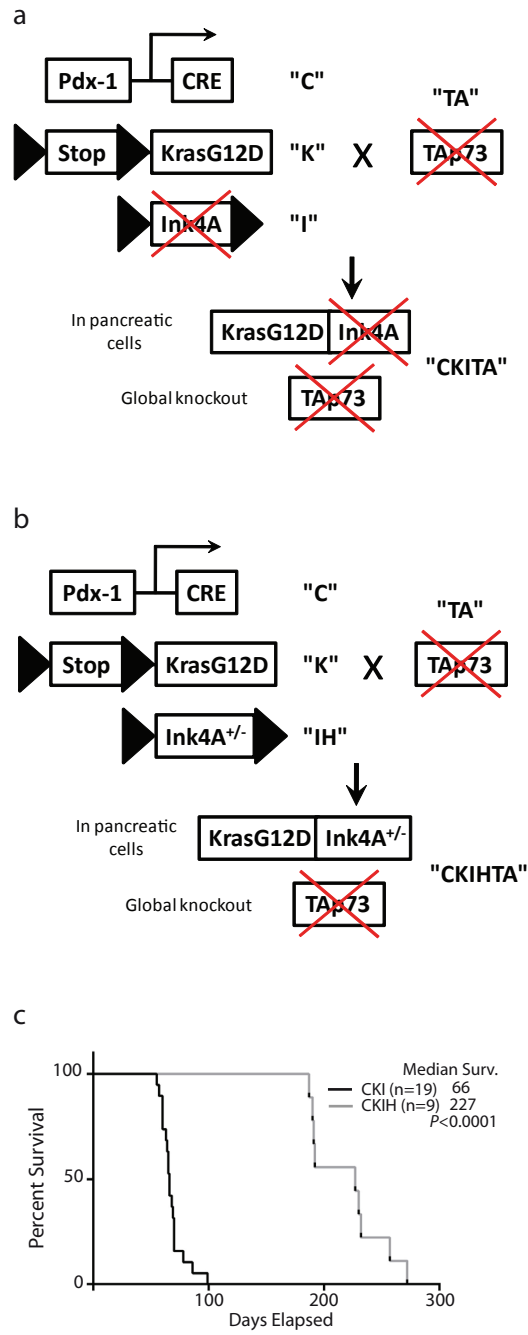

Supplement: cdd201618x3.pdf [file cdd201618x3.pdf]

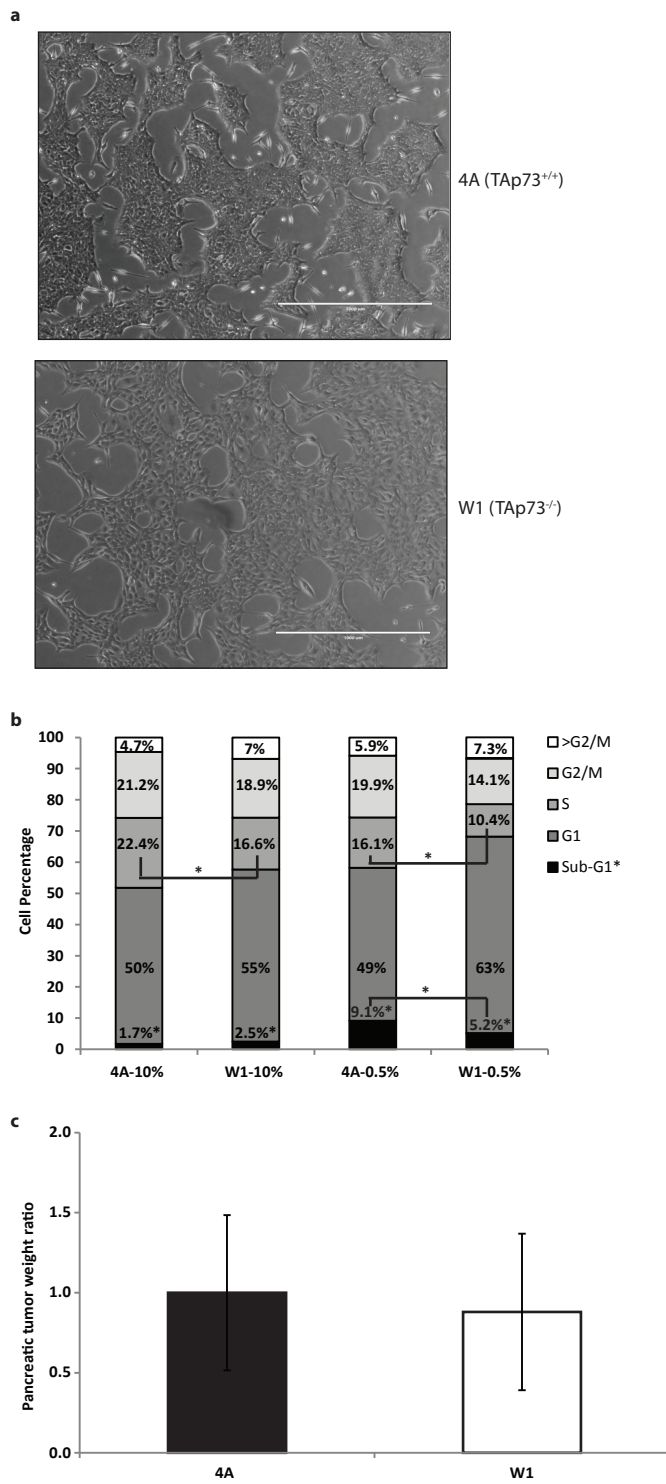

Supplement: cdd201618x4.pdf [file cdd201618x4.pdf]

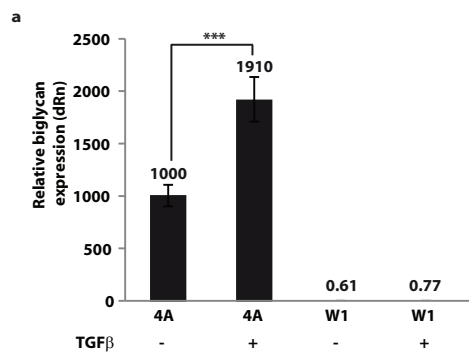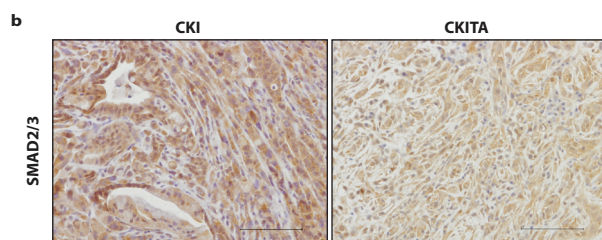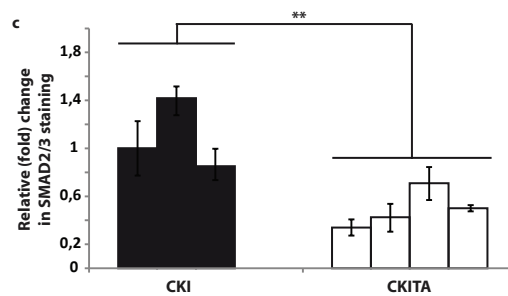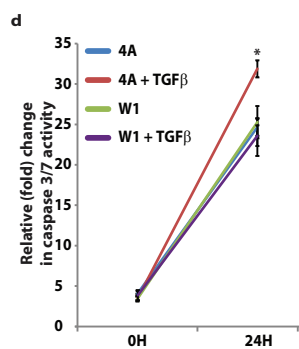

Supplement: cdd201618x5.pdf [file cdd201618x5.pdf]
